# Supplementary material
Source: HighWire-hosted journal article supplement (https://www.annals.org/content/suppl/2007/06/29/147.1.51)
Supplement: Perkins_AT_147-1-51-DC1-A1.pdf [file Perkins_AT_147-1-51-DC1-A1.pdf]

**Appendix Table. A Comparison of Selected Advance Directives\***

| Variable                 | <i>A Living Will</i> (22)                                                                                                                                                                                       | <i>The Medical Directive</i> (23)                                                                                                                                                                                                                                                                                                                                                                                                                                                                                                                            | <i>Your Life, Your Choices</i> (24)                                                                                                                                                                                                                                                                                                                                                                                                                                                                                                                                                                                                                                                                                                                                                                                                                                                                                                      | Texas Advance Directive Act (25)                                                                                                                                                                                                                                                                                                                                                                                                                                                                                             | <i>Five Wishes</i> (26)                                                                                                                                                                                                                                                                                                                                                    |
|--------------------------|-----------------------------------------------------------------------------------------------------------------------------------------------------------------------------------------------------------------|--------------------------------------------------------------------------------------------------------------------------------------------------------------------------------------------------------------------------------------------------------------------------------------------------------------------------------------------------------------------------------------------------------------------------------------------------------------------------------------------------------------------------------------------------------------|------------------------------------------------------------------------------------------------------------------------------------------------------------------------------------------------------------------------------------------------------------------------------------------------------------------------------------------------------------------------------------------------------------------------------------------------------------------------------------------------------------------------------------------------------------------------------------------------------------------------------------------------------------------------------------------------------------------------------------------------------------------------------------------------------------------------------------------------------------------------------------------------------------------------------------------|------------------------------------------------------------------------------------------------------------------------------------------------------------------------------------------------------------------------------------------------------------------------------------------------------------------------------------------------------------------------------------------------------------------------------------------------------------------------------------------------------------------------------|----------------------------------------------------------------------------------------------------------------------------------------------------------------------------------------------------------------------------------------------------------------------------------------------------------------------------------------------------------------------------|
| Publication date         | 1978                                                                                                                                                                                                            | 1990                                                                                                                                                                                                                                                                                                                                                                                                                                                                                                                                                         | 1996 and 2001                                                                                                                                                                                                                                                                                                                                                                                                                                                                                                                                                                                                                                                                                                                                                                                                                                                                                                                            | 1999 and 2004                                                                                                                                                                                                                                                                                                                                                                                                                                                                                                                | 2000                                                                                                                                                                                                                                                                                                                                                                       |
| Author or publisher      | Concern for Dying                                                                                                                                                                                               | Ezekiel LE, Emanuel EJ                                                                                                                                                                                                                                                                                                                                                                                                                                                                                                                                       | Pearlman et al., VHA, U.S. Department of Veterans Affairs                                                                                                                                                                                                                                                                                                                                                                                                                                                                                                                                                                                                                                                                                                                                                                                                                                                                                | Office of the Attorney General, State of Texas                                                                                                                                                                                                                                                                                                                                                                                                                                                                               | Aging with Dignity                                                                                                                                                                                                                                                                                                                                                         |
| Area of legal validity   | Unspecified                                                                                                                                                                                                     | Discussed but unclear                                                                                                                                                                                                                                                                                                                                                                                                                                                                                                                                        | Discussed but unclear                                                                                                                                                                                                                                                                                                                                                                                                                                                                                                                                                                                                                                                                                                                                                                                                                                                                                                                    | Texas                                                                                                                                                                                                                                                                                                                                                                                                                                                                                                                        | 36 states and District of Columbia                                                                                                                                                                                                                                                                                                                                         |
| Where accessible?        | Probably no longer accessible                                                                                                                                                                                   | JAMA (1989;261:3288-93)                                                                                                                                                                                                                                                                                                                                                                                                                                                                                                                                      | www.hrsd.research.va.gov/publications/internal/ylyc.htm (accessed 6 March 2007)                                                                                                                                                                                                                                                                                                                                                                                                                                                                                                                                                                                                                                                                                                                                                                                                                                                          | www.oag.state.tx.us/elder/elder.shtml#legal (accessed 6 March 2007)                                                                                                                                                                                                                                                                                                                                                                                                                                                          | www.agingwithdignity.org (accessed 24 November 2006); also available at 888-5WISHES                                                                                                                                                                                                                                                                                        |
| Additional information   | <i>Questions and Answers about the Living Will</i> , other bibliography, articles, case studies, and films—likely outdated and unavailable                                                                      | Professional journal article                                                                                                                                                                                                                                                                                                                                                                                                                                                                                                                                 | 52-page workbook                                                                                                                                                                                                                                                                                                                                                                                                                                                                                                                                                                                                                                                                                                                                                                                                                                                                                                                         | 5-page <i>Senior Texans: Advance Care Planning</i> supplement at www.oag.state.tx.us/AG_publications/txts/Advance_Care.shtml (accessed 20 November 2006)                                                                                                                                                                                                                                                                                                                                                                     | <i>Five Wishes</i> video                                                                                                                                                                                                                                                                                                                                                   |
| Eligible signers         | Unspecified                                                                                                                                                                                                     | Adults of sound mind                                                                                                                                                                                                                                                                                                                                                                                                                                                                                                                                         | Any nonpregnant person capable of willful, voluntary decisions                                                                                                                                                                                                                                                                                                                                                                                                                                                                                                                                                                                                                                                                                                                                                                                                                                                                           | Nonpregnant adults may sign all 3 documents; proxies or 2 physicians of incompetents may also sign out-of-hospital DNR+ order                                                                                                                                                                                                                                                                                                                                                                                                | Anyone older than age 17 years                                                                                                                                                                                                                                                                                                                                             |
| Length and format        | 2 pages and wallet card (for a contribution)                                                                                                                                                                    | 4 pages, no wallet card                                                                                                                                                                                                                                                                                                                                                                                                                                                                                                                                      | 4 pages and wallet card                                                                                                                                                                                                                                                                                                                                                                                                                                                                                                                                                                                                                                                                                                                                                                                                                                                                                                                  | 8 pages for all 3 documents, no wallet card                                                                                                                                                                                                                                                                                                                                                                                                                                                                                  | 12 pages and wallet card                                                                                                                                                                                                                                                                                                                                                   |
| Conditions for effecting | No recovery expected from “extreme physical or mental disability”                                                                                                                                               | 4 “representative” states of mental incompetence (such as coma, vegetative state, and other brain damage) with varied survivals and disabilities                                                                                                                                                                                                                                                                                                                                                                                                             | Coma or vegetative state, stroke, dementia, and terminal illness                                                                                                                                                                                                                                                                                                                                                                                                                                                                                                                                                                                                                                                                                                                                                                                                                                                                         | Condition likely to kill patient within 6 months or irreversible condition such that patient “cannot care for (him)self or make decisions and (would die) without life support”                                                                                                                                                                                                                                                                                                                                              | Imminent death, severe brain damage (such as permanent coma), or other conditions the signer describes                                                                                                                                                                                                                                                                     |
| Treatment choicest       | Decline “artificial means” or “heroic (life-support) measures”                                                                                                                                                  | Choose or decline life-support and other measures Allows “trial of therapy” and “undecided” responses                                                                                                                                                                                                                                                                                                                                                                                                                                                        | Choose or refuse life-support measures and hospice care Allows “don’t know” responses                                                                                                                                                                                                                                                                                                                                                                                                                                                                                                                                                                                                                                                                                                                                                                                                                                                    | Choose or refuse life-support measures individually or as a package                                                                                                                                                                                                                                                                                                                                                                                                                                                          | Choose or refuse life support as a package or allow a physician to decide                                                                                                                                                                                                                                                                                                  |
| Choices about cadaver    | Tissue donation                                                                                                                                                                                                 | Organ or body donation for transplantation, education, or research                                                                                                                                                                                                                                                                                                                                                                                                                                                                                           | Organ donation, autopsy, other research on body, and burial or cremation                                                                                                                                                                                                                                                                                                                                                                                                                                                                                                                                                                                                                                                                                                                                                                                                                                                                 | None                                                                                                                                                                                                                                                                                                                                                                                                                                                                                                                         | Organ donation, burial, and cremation                                                                                                                                                                                                                                                                                                                                      |
| Special features         | The most familiar early directive; now outdated<br>Very brief<br>Allows request for home care if it would “not jeopardize . . . recovery to a meaningful and sentient life or impose an undue burden” on family | Brief<br>Lists many life-support and other treatments<br>Poses questions to help patient define medical conditions too “hard” to justify prolonging life<br>Allows personal statement<br>Acknowledges need for proxy judgment when patient’s wishes are unclear, patient is undecided, or situations are different from the 4 representative states<br>States priority between patient instructions and proxy decisions and among proxies if conflicts arise<br>Emphasizes physician’s ongoing duties to diagnosis, assess prognosis, educate, and recommend | Easy-to-read layout with excellent graphics<br>Comprehensive<br>Workbook defines key concepts simply and uses case examples<br>Emphasizes the patient’s understanding of concepts<br>Explains in everyday English common serious health conditions and their treatments<br>Keys patient preferences to explanations in grid format<br>Helps patient define relevant spiritual beliefs, hope for recovery, and acceptance of risk<br>Workbook includes directives; Web site gives parallel references to VHA directives<br>Gives tips for end-of-life care discussions with family and physicians<br>Cautions about ambiguities of common terms, such as “pulling the plug”<br>Allows instructions about how strictly to follow patient’s wishes<br>Includes funeral wishes<br>Uses divider tabs, sidebar summaries, and prompts for easy reference<br>Gives completion checklist<br>Gives contact information for relevant organizations | Combines laws about instructional directives, proxy directives, and out-of-hospital DNR orders<br>Emphasizes that spouses cannot intuit patient wishes<br>Differentiates powers of attorney for medical care and property management<br>Directives come in English and Spanish language; out-of-hospital DNR only in English<br>Requires physician to transfer patient if physician cannot fulfill patient’s wishes<br>Allows expiration date<br>Authorizes out-of-hospital DNR identification band<br>Explains hospice care | Uses simple language<br>Addresses personal, emotional, and spiritual needs, as well as medical needs; claims to be “the Living Will with a Heart and Soul”<br>Gives instructions about revoking previous directives<br>Lists traits of good proxy<br>Lists decision-making powers of proxy<br>Allows patient to write additional instructions<br>Includes funeral wishes   |
| Drawbacks                | Does not define key concepts<br>Gives vague instructions that are difficult to interpret clinically                                                                                                             | Uses word-dense layout<br>Explains treatments too simplistically<br>Allows mutually exclusive treatment choices                                                                                                                                                                                                                                                                                                                                                                                                                                              | Workbook length is daunting<br>States some hopes as facts, such as directives “prevent confusion and . . . ease the burden on families”<br>1996 workbook directives use legal language and key to Washington state law                                                                                                                                                                                                                                                                                                                                                                                                                                                                                                                                                                                                                                                                                                                   | Gives sketchy definitions of life-support measures<br>Makes unrealistic promises to “prevent arguments and bad feelings at the end of life,” to achieve a “gentle” or “good end of life,” and to help give survivors “a more peaceful bereavement”                                                                                                                                                                                                                                                                           | Copyrighted<br>Costs \$1–\$5 each<br>Makes unrealistic promise to give “control (over) . . . how you are treated if you get seriously ill”<br>Lists but does not define specific life-support measures<br>Offers some unrealistic options, such as to “be kept fresh and clean at all times” and to protect family from guessing “what you want” and making “hard choices” |

## Appendix Table—Continued

| Advance Health Care Directive (27)                                                                                                                                                                                                                                                                                                                                                                                                                                                                                                                                                                                                                                                                                                                                                              | VHA Long-Term Care Advance Care Proxy Planning (28)                                                                                                                                                   | VHA Advance Directives (29)                                                                                                                                                                                                                                                                                                                                                                                                                                                                                                                                                                                                                                                                                                                  | Medical Orders for Life-Sustaining Treatment (30)                                                                                                                                                                                                                                                                                                                                                                                                                                                                                                                                                                                                                                                                                                           |
|-------------------------------------------------------------------------------------------------------------------------------------------------------------------------------------------------------------------------------------------------------------------------------------------------------------------------------------------------------------------------------------------------------------------------------------------------------------------------------------------------------------------------------------------------------------------------------------------------------------------------------------------------------------------------------------------------------------------------------------------------------------------------------------------------|-------------------------------------------------------------------------------------------------------------------------------------------------------------------------------------------------------|----------------------------------------------------------------------------------------------------------------------------------------------------------------------------------------------------------------------------------------------------------------------------------------------------------------------------------------------------------------------------------------------------------------------------------------------------------------------------------------------------------------------------------------------------------------------------------------------------------------------------------------------------------------------------------------------------------------------------------------------|-------------------------------------------------------------------------------------------------------------------------------------------------------------------------------------------------------------------------------------------------------------------------------------------------------------------------------------------------------------------------------------------------------------------------------------------------------------------------------------------------------------------------------------------------------------------------------------------------------------------------------------------------------------------------------------------------------------------------------------------------------------|
| 2000–2006                                                                                                                                                                                                                                                                                                                                                                                                                                                                                                                                                                                                                                                                                                                                                                                       | 2002                                                                                                                                                                                                  | 1998 and 2003                                                                                                                                                                                                                                                                                                                                                                                                                                                                                                                                                                                                                                                                                                                                | 2005                                                                                                                                                                                                                                                                                                                                                                                                                                                                                                                                                                                                                                                                                                                                                        |
| California Medical Association                                                                                                                                                                                                                                                                                                                                                                                                                                                                                                                                                                                                                                                                                                                                                                  | Volicer et al.; VHA National Ethics Committee                                                                                                                                                         | VHA National Center for Ethics in Health Care                                                                                                                                                                                                                                                                                                                                                                                                                                                                                                                                                                                                                                                                                                | Rochester Health Commission                                                                                                                                                                                                                                                                                                                                                                                                                                                                                                                                                                                                                                                                                                                                 |
| California                                                                                                                                                                                                                                                                                                                                                                                                                                                                                                                                                                                                                                                                                                                                                                                      | Unclear: not an “official” form but a model for local facilities to use in developing their own forms                                                                                                 | Veterans Health System                                                                                                                                                                                                                                                                                                                                                                                                                                                                                                                                                                                                                                                                                                                       | New York                                                                                                                                                                                                                                                                                                                                                                                                                                                                                                                                                                                                                                                                                                                                                    |
| www.cmanet.org/publicdoc.cfm/7 (accessed 6 March 2007)                                                                                                                                                                                                                                                                                                                                                                                                                                                                                                                                                                                                                                                                                                                                          | J Am Geriatr Soc (2002;50:761-7)                                                                                                                                                                      | www1.va.gov/vhapublications/ViewPublication.asp?pub_ID=1450 (accessed 6 March 2007)                                                                                                                                                                                                                                                                                                                                                                                                                                                                                                                                                                                                                                                          | www.health.state.ny.us/professionals/patients/patient_rights/molst (accessed 24 November 2006)                                                                                                                                                                                                                                                                                                                                                                                                                                                                                                                                                                                                                                                              |
| 6-page <i>Advance Health Care Directive Kit and Deciding To Forgo Treatment: Advance Directives</i>                                                                                                                                                                                                                                                                                                                                                                                                                                                                                                                                                                                                                                                                                             | Professional journal article                                                                                                                                                                          | 7-page VHA handbook defining staff duties                                                                                                                                                                                                                                                                                                                                                                                                                                                                                                                                                                                                                                                                                                    | 20-page <i>Guidebook to MOLST</i>                                                                                                                                                                                                                                                                                                                                                                                                                                                                                                                                                                                                                                                                                                                           |
| Legal adult California residents                                                                                                                                                                                                                                                                                                                                                                                                                                                                                                                                                                                                                                                                                                                                                                | Proxy and professional caregivers of incapacitated veteran patients                                                                                                                                   | Veteran patients                                                                                                                                                                                                                                                                                                                                                                                                                                                                                                                                                                                                                                                                                                                             | Health professional completes, and physician signs for patient or proxy                                                                                                                                                                                                                                                                                                                                                                                                                                                                                                                                                                                                                                                                                     |
| 8 pages and wallet cards                                                                                                                                                                                                                                                                                                                                                                                                                                                                                                                                                                                                                                                                                                                                                                        | 2 pages, no wallet card                                                                                                                                                                               | 6 pages, no wallet card                                                                                                                                                                                                                                                                                                                                                                                                                                                                                                                                                                                                                                                                                                                      | 4 pages, no wallet card                                                                                                                                                                                                                                                                                                                                                                                                                                                                                                                                                                                                                                                                                                                                     |
| Kit claims “any situation (when) you are unable to make your own decisions,” but directive specifies only death within months or permanent life-support dependence with inability to make decisions                                                                                                                                                                                                                                                                                                                                                                                                                                                                                                                                                                                             | Conditions that normally require hospitalization and life support                                                                                                                                     | Irreversible unconsciousness or terminal condition                                                                                                                                                                                                                                                                                                                                                                                                                                                                                                                                                                                                                                                                                           | Patient’s current condition specified, but other conditions not specified                                                                                                                                                                                                                                                                                                                                                                                                                                                                                                                                                                                                                                                                                   |
| Choose or refuse proxy, physician, care facility, life-support measures, and release of information                                                                                                                                                                                                                                                                                                                                                                                                                                                                                                                                                                                                                                                                                             | Choose or refuse acute care hospitalization, “advanced interventions,” other life-support measures, artificial hydration and nutrition, and comfort care                                              | Refuse life-sustaining measures as a package                                                                                                                                                                                                                                                                                                                                                                                                                                                                                                                                                                                                                                                                                                 | Choose or refuse CPR, intubation and mechanical ventilation, nutrition and hydration, antibiotics, and comfort care only; may also choose trial of treatment                                                                                                                                                                                                                                                                                                                                                                                                                                                                                                                                                                                                |
| Organ donation, autopsy (for education, research, or transplantation purposes), and body disposal                                                                                                                                                                                                                                                                                                                                                                                                                                                                                                                                                                                                                                                                                               | None                                                                                                                                                                                                  | None                                                                                                                                                                                                                                                                                                                                                                                                                                                                                                                                                                                                                                                                                                                                         | None                                                                                                                                                                                                                                                                                                                                                                                                                                                                                                                                                                                                                                                                                                                                                        |
| Offers DNR form for patients and preferred intensity of treatment form for physicians to complete on behalf of patients in long-term care facilities<br>Kit and DNR form in English or Spanish language<br>Uses simple language<br>Kit answers common questions succinctly<br>Kit gives space to list people with copies<br>Allows personal statement about treatment wishes<br>Reminds proxies to make sure patient wishes guide decision making<br>Gives option allowing proxy to make decisions before patient loses decision-making capacity<br>Requires signatures of 2 witnesses, notary public, or nursing home ombudsman<br>Allows an expiration date<br>Encourages use of prehospital DNR form<br>Replaces Natural Death Act Declaration and Durable Power of Attorney for Health Care | Covers incompetent nursing home residents without advance directives<br>Suggests attendees for care-planning conference<br>Reminds to update with each year, transfer, or change of medical condition | Commits to respecting patient wishes<br>Emphasizes advance care planning in outpatient clinic<br>“Tools” to aid discussion<br>Emphasizes patient education and collaborative decision making<br>Defines key concepts simply (including decision-making capacity)<br>Allows verbal instructions when patient cannot sign<br>Reminds to communicate wishes and distribute directive properly<br>Assigns to each facility’s staff the responsibility for conducting this process<br>Gives specific instructions for filing and implementing<br>Requires review annually and at each hospitalization<br>Allows health professional to transfer patient if directive violates professional’s conscience<br>Outlines dispute resolution procedures | Adopted from a model document used in Oregon§<br>“Translates current treatment preferences into physician orders”<br>Summarizes but does not replace New York Living Will or New York Health Care Proxy directives<br>Supplemental documentation form for special patients, including those lacking capacity to consent<br>Requires review at hospitalizations and transfers, at changes of medical condition or wishes, and at least every 60 days for nursing home residents or every 90 days for other patients<br>Physician may complete sections about non-CPR treatments on the basis of “clear and convincing evidence” of patient’s wishes<br>Default for uncompleted sections is full treatment<br>Uses bright pink paper for ready identification |
| Gives sketchy definitions of life-support treatments<br>Kit is copyrighted<br>Kit and forms cost \$1–\$5 each                                                                                                                                                                                                                                                                                                                                                                                                                                                                                                                                                                                                                                                                                   | Makes exaggerated claim that patients “can continue to direct their medical care” when no longer competent<br>Specific for VHA; may have limited validity elsewhere                                   | Specific for VHA; may have limited validity elsewhere<br>Does not implement features of state directives conflicting with VHA policy<br>Prevents care team from overruling any proxy decision                                                                                                                                                                                                                                                                                                                                                                                                                                                                                                                                                | Copyrighted<br>Conditions for effecting other than patient’s current condition are unspecified<br>Burdensome frequent review                                                                                                                                                                                                                                                                                                                                                                                                                                                                                                                                                                                                                                |

\* CPR = cardiopulmonary resuscitation; DNR = do not resuscitate; MOLST = Medical Orders for Life-Sustaining Treatment; VHA = Veterans Health Administration.

† “Life support,” as used in these documents, typically includes CPR, intensive care, and mechanical ventilation but may also include antibiotics, chemotherapy, fluids and nutrition, and other treatments.

‡ Includes Texas’ Directive to Physicians and Family or Surrogates (revised 1999), Medical Power of Attorney (revised 1999), and Out-of-Hospital DNR order (revised 2004).

§ *Physicians’ Orders for Life-Sustaining Treatment*: Information about this prototype document is available at [www.polst.org](http://www.polst.org); at the Center for Ethics in Health Care, Oregon Health Sciences University, 3181 Sam Jackson Park Road, UHN-86, Portland, OR 97239-3098; or at 503-494-3965.
